# Supplementary material
Source: publisher figshare collection journal article supplement (https://asha.figshare.com/articles/dataset/_/25927366)
Supplement: Supplementary file 2 [file 1]

## **Supplemental Material S5. Student essay examples with noun agreement coding.**

### **Spanish Essays**

#### ***Grade 1, English Learner, Male, 6.42 years old enrolled in English immersion***

Unos[AGR] **niños** jugando soccer metió [DISAGR] un[AGR] **gol**. Y el[AGR] **equipo** ganó[AGR].

#### ***Grade 1, Simultaneous Bilingual, Female, 6.75 years old enrolled in Dual immersion***

En la[AGR] primer[DISAGR] **foto** puede ver que la[AGR] **niña** va[AGR] a patear el[DISAGR] **pelota**. En el[DISAGR] segundo[DISAGR] **foto** puede ver que la[AGR] **niña** pateó el[DISAGR] **pelota** en la[DISAGR] **gol**. En la[AGR] última[AGR] **foto** puede ver que la[AGR] **niña** pateó[AGR] la[AGR] **pelota**.

### **English Essays**

#### ***Grade 1, English Learner, Female, 6.75 years old enrolled in Dual immersion***

**They** like[AGR] to play. Then next, **Juan** fall[DISAGREE]. And **Juan** bleed[DISAGR]. And the **mom** see[DISAGR] **was**[AGR] crying.

#### ***Grade 1, English Learner, Male, 7.17 years old enrolled in English immersion***

**They** are[AGR] playing. But **Sam** falls[AGR] on the ground. Then **he** bleed[DISAGR].
