# Supplementary material
Source: publisher figshare collection journal article supplement (https://asha.figshare.com/articles/dataset/_/25927366)
Supplement: Supplementary file 3 [file 1]

**Supplemental Material S3.** Bivariate correlations between syntax features and writing quality by English learner status.

|                                | English Learner ( <i>n</i> = 213) | Non-English Learner ( <i>n</i> = 64) |
|--------------------------------|-----------------------------------|--------------------------------------|
| <b>Spanish Writing Quality</b> |                                   |                                      |
| Spanish MLU                    | .24                               | .49                                  |
| Spanish Number of Verbs        | .29                               | .48                                  |
| Spanish N-Agree Total          | .26                               | .41                                  |
| Spanish N-Agree Accuracy       | .27                               | .52                                  |
| English MLU                    | .27                               | .08                                  |
| English Number of Verbs        | .23                               | -.05                                 |
| English S-Agree Accuracy       | .21                               | -.02                                 |
| <b>English Writing Quality</b> |                                   |                                      |
| English MLU                    | .31                               | .13                                  |
| English Number of Verbs        | .31                               | .32                                  |
| English S-Agree Accuracy       | .29                               | .42                                  |
| Spanish MLU                    | .27                               | .10                                  |
| Spanish Number of Verbs        | .23                               | .13                                  |
| Spanish N-Agree Total          | .22                               | .01                                  |
| Spanish N-Agree Accuracy       | .22                               | .11                                  |

*Note.* MLU = Mean length of utterances; n-agree = Spanish noun agreement words; s-agree = English subject agreement words. See Table 5 for statistical difference controlling for grade level, English learner status, and instructional program.
