# Supplementary material
Source: publisher figshare collection journal article supplement (https://asha.figshare.com/articles/dataset/_/25927366)
Supplement: Supplementary file 4 [file 1]

**Supplemental Material S4.** Bivariate correlations between syntax features and writing quality by instructional program.

|                                | Dual Immersion ( <i>n</i> = 228) | English Immersion ( <i>n</i> =49) |
|--------------------------------|----------------------------------|-----------------------------------|
| <b>Spanish Writing Quality</b> |                                  |                                   |
| Spanish MLU                    | .23                              | .44                               |
| Spanish Number of Verbs        | .25                              | .38                               |
| Spanish N-Agree Total          | .23                              | .30                               |
| Spanish N-Agree Accuracy       | .24                              | .34                               |
| English MLU                    | .27                              | .31                               |
| English Number of Verbs        | .23                              | .33                               |
| English S-Agree Accuracy       | .22                              | .35                               |
| <b>English Writing Quality</b> |                                  |                                   |
| English MLU                    | .26                              | .40                               |
| English Number of Verbs        | .32                              | .49                               |
| English S-Agree Accuracy       | .32                              | .47                               |
| Spanish MLU                    | .24                              | .25                               |
| Spanish Number of Verbs        | .23                              | .36                               |
| Spanish N-Agree Total          | .16                              | .36                               |
| Spanish N-Agree Accuracy       | .21                              | .32                               |

*Note.* MLU = Mean length of utterances; n-agree = noun agreement words; s-agree = subject agreement words. See Table 5 for statistical difference controlling for grade level, English learner status, and instructional program.
